# Supplementary material
Source: HighWire-hosted journal article supplement (https://erj.ersjournals.com/content/54/1/1900531)
Supplement: inline-supplementary-material-1 [file inline-supplementary-material-1.pdf]

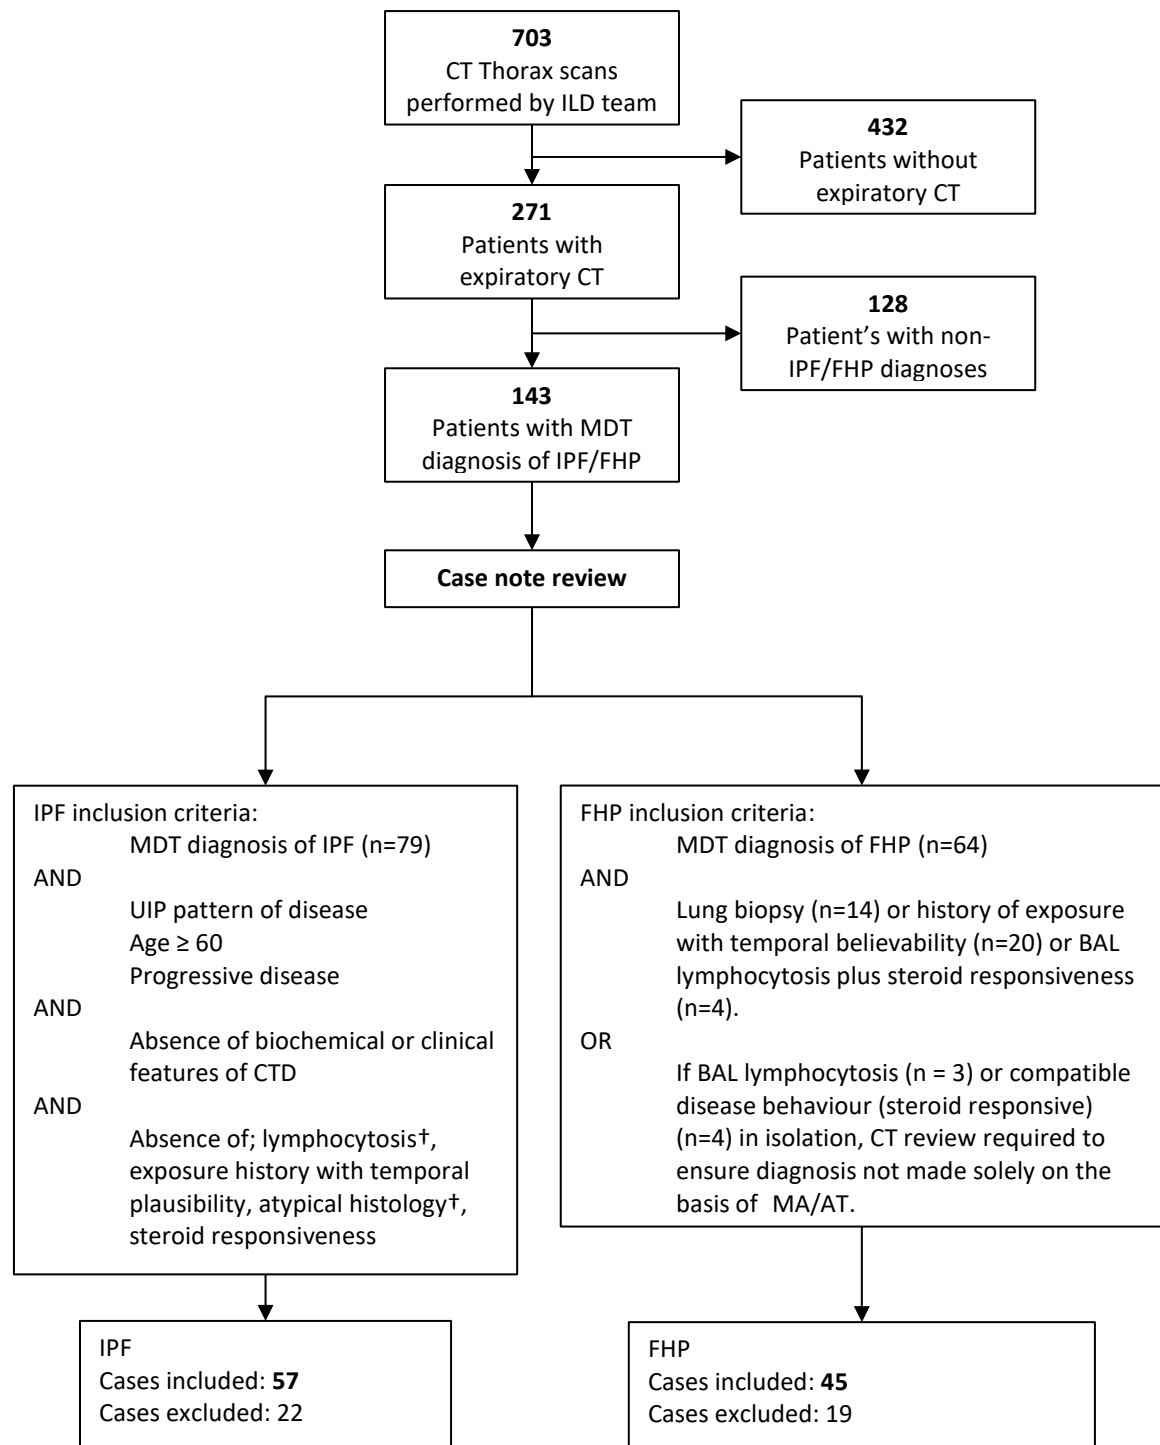

Supplementary figure S1; consort diagram for derivation cohort. † data used where available

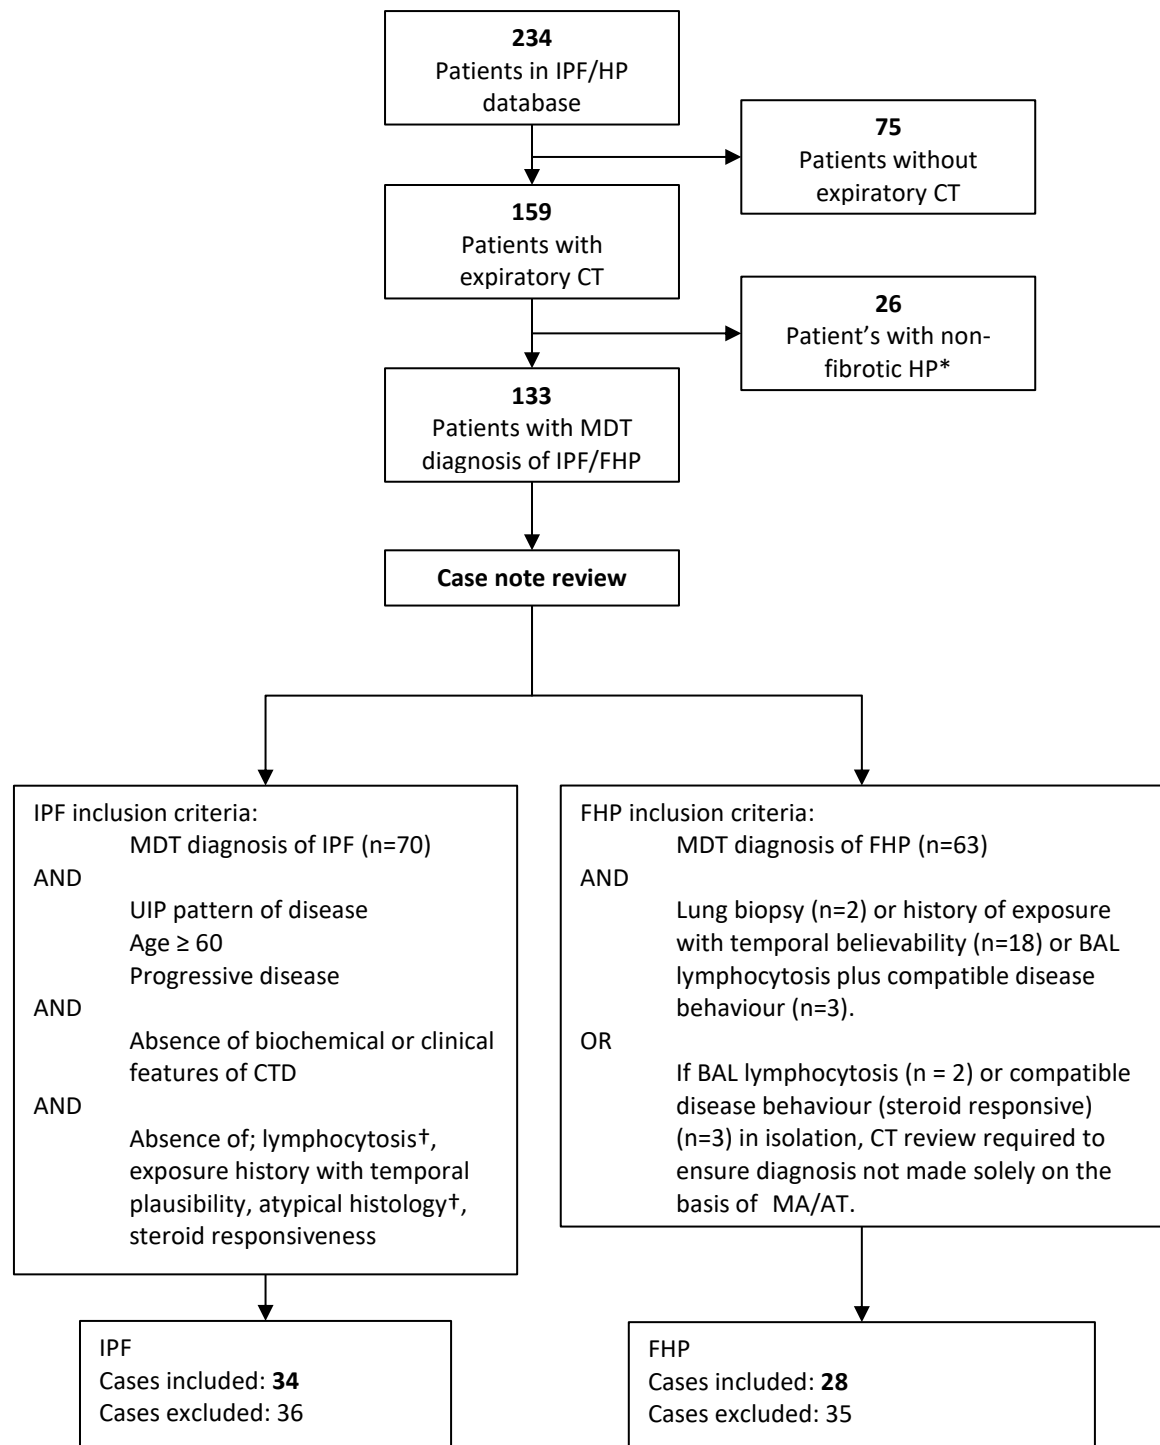

Supplementary figure S2; consort diagram for validation cohort. \*Fibrotic HP was defined as the presence of traction bronchiectasis or honeycombing in a patient with an MDT diagnosis of HP. This was reviewed by one radiologist (JB), and cases without fibrosis were excluded. † data used where available.

Supplementary table S1: Categorical Scoring System for MA Variables  
Each MA variable (low density lobules, preserved lobules, expiratory air trapping) was scored on a lobar basis, with the lingua defined as the 6<sup>th</sup> lobe.

| Extent                | Score |
|-----------------------|-------|
| not present in lobe   | 0     |
| one – two lobules     | 1     |
| three – four lobules  | 2     |
| five – six lobules    | 3     |
| seven – eight lobules | 4     |
| nine – ten lobules    | 5     |
| more than ten lobules | 6     |
